# Supplementary material for: Tracking Wheat Variety and Origin by the Shape Analysis of the Volatiles Fingerprint of Wheat Kernels and Wheat Beers
Source: MDPI journal article supplement (doi:10.3390/app12157854), 2022-08-04
Supplement: s1 [file s1]

**Table S1.** VOCs identified in wheat kernels and wheat beers obtained by them. Compounds are ordered by chemical group and subsequently retention time.

| Chemical group      | VOCs in wheat kernel                                                                                                                                                                                                                                                                                                                                                                                                                               | VOCs in wheat beer                                                                                                                        |
|---------------------|----------------------------------------------------------------------------------------------------------------------------------------------------------------------------------------------------------------------------------------------------------------------------------------------------------------------------------------------------------------------------------------------------------------------------------------------------|-------------------------------------------------------------------------------------------------------------------------------------------|
| Alcohols            | 1-Butanol, 2-methyl-<br>1-Pentanol<br>3-Hexen-1-ol<br>1-Hexanol<br>1-Pentanol, 2-ethyl<br>1-Heptanol<br>1-Octen-3-ol<br>5-Hepten-2-ol, 6-methyl<br>2-Ethyl-1-hexanol<br>Benzyl alcohol<br>2-Octen-1-ol, (E)-<br>1-Octanol<br>Phenethyl Alcohol<br>1-Nonanol<br>1-Decanol<br>1-Undecanol<br>1-Dodecanol<br>2-Tridecanol<br>1-Tridecanol<br>2-Hexadecanol<br>2-Heptadecanol                                                                          | 1-Propanol, 2-methyl-<br>1-Butanol, 3-methyl-<br>1-Butanol, 2-methyl-<br>2-Ethyl-1-hexanol<br>1-Octanol<br>Phenethyl Alcohol<br>1-Decanol |
| Aldehydes           | Butanal, 2-methyl-<br>Pentanal<br>Hexanal<br>2-Hexenal, (E)-<br>Heptanal<br>2-Heptenal, (Z)-<br>Benzaldehyde<br>Octanal<br>Phenylacetaldehyde<br>2-Octenal, (E)-<br>Nonanal<br>2-Nonenal, (E)-<br>Benzaldehyde, 3-ethyl-<br>Decanal<br>2,4-Nonadienal, (E,E)-<br>Isophthalaldehyde<br>4-Oxononanal<br>2-Decenal, (Z)-<br>Undecanal<br>2,4-Decadienal, (E,E)-<br>2-Undecenal<br>Vanillin<br>Dodecanal<br>Tridecanal<br>Tetradecanal<br>Pentadecanal | Nonanal<br>Decanal                                                                                                                        |
| Alkanes             | Octane, 2-methyl-<br>Undecane<br>Dodecane<br>Tridecane<br>Tetradecane<br>Pentadecane<br>Hexadecane<br>Octadecane                                                                                                                                                                                                                                                                                                                                   |                                                                                                                                           |
| Alkenes             | 1-Dodecene<br>1-Tetradecene<br>1-Pentadecene<br>1-Hexadecene                                                                                                                                                                                                                                                                                                                                                                                       |                                                                                                                                           |
| Benzene derivatives | Toluene                                                                                                                                                                                                                                                                                                                                                                                                                                            | Styrene                                                                                                                                   |

| Chemical group | VOCs in wheat kernel                                                                                                                                                                                                                                                                                                                                                                                                                                                                                                                                   | VOCs in wheat beer                                                                                                                                                                                                                                                                                                |
|----------------|--------------------------------------------------------------------------------------------------------------------------------------------------------------------------------------------------------------------------------------------------------------------------------------------------------------------------------------------------------------------------------------------------------------------------------------------------------------------------------------------------------------------------------------------------------|-------------------------------------------------------------------------------------------------------------------------------------------------------------------------------------------------------------------------------------------------------------------------------------------------------------------|
|                | Styrene                                                                                                                                                                                                                                                                                                                                                                                                                                                                                                                                                |                                                                                                                                                                                                                                                                                                                   |
| Esters         | Benzyl Benzoate<br>Methyl hexanoate<br>Ethyl decanoate<br>Diethyl Phthalate<br>Ethyl dodecanoate<br>Tetradecanoic acid, ethyl ester<br>Diisobutyl phthalate<br>Ethyl palmitate                                                                                                                                                                                                                                                                                                                                                                         | Ethyl acetate<br>2-Methylpropyl acetate<br>Ethyl butyrate<br>3-Methylbutyl acetate<br>Ethyl hexanoate<br>Ethyl heptanoate<br>Heptyl acetate<br>Ethyl octanoate<br>Nonyl acetate<br>Ethyl 2-phenylacetate<br>2-Phenylethyl acetate<br>Ethyl nonanoate<br>Ethyl 9-decenoate<br>Ethyl decanoate<br>Ethyl dodecanoate |
| Ethers         | Ethanol, 2-butoxy-<br>Guaiacol<br>Benzene, 1,2-dimethoxy-<br>Ethanol, 2-(2-butoxyethoxy)-<br>Diphenyl ether                                                                                                                                                                                                                                                                                                                                                                                                                                            |                                                                                                                                                                                                                                                                                                                   |
| Ketones        | 2-Heptanone<br>5-Hepten-2-one, 6-methyl-<br>3-Octen-2-one<br>2,3-Octanedione<br>Acetophenone<br>3,5-Octadien-2-one, (E,E)-<br>2-Nonanone<br>3,5-Nonadien-2-one<br>3,5-Heptadien-2-one, 6-methyl-, (E)-<br>Isophorone<br>2-Decanone<br>3-hepten-2-one, 5-ethyl-6-methyl-, (3E)-<br>2-Sec-Butylcyclohexanone<br>Ethanone, 1-(3,4-dimethylphenyl)-<br>2-Undecanone<br>1,4-Diacetylbenzene<br>5,9-Undecadien-2-one,6,10-dimethyl-<br>trans- $\beta$ -Ionone<br>2-tridecanone<br>2-Pentadecanone<br>2-Pentadecanone, 6,10, 14-trimethyl-<br>2-Heptadecanone | 2-Nonanone                                                                                                                                                                                                                                                                                                        |
| Lactones       | $\gamma$ -Butyrolactone<br>$\gamma$ -Caprolactone<br>$\gamma$ -Octalactone<br>$\gamma$ -Nonalactone<br>Coumarin                                                                                                                                                                                                                                                                                                                                                                                                                                        |                                                                                                                                                                                                                                                                                                                   |
| Organic acids  | Acetic acid<br>Pentanoic acid<br>Hexanoic acid<br>Heptanoic acid<br>Hexanoic acid, 2-ethyl<br>Octanoic acid<br>Nonanoic acid<br>Decanoic acid<br>Dodecanoic acid<br>Myristic acid<br>n-Hexadecanoic acid                                                                                                                                                                                                                                                                                                                                               | Pentanoic acid<br>Octanoic acid<br>Decanoic acid                                                                                                                                                                                                                                                                  |
| Others         | Oxime-, methoxy-phenyl-<br>Phenol<br>Furan, 2-pentyl-                                                                                                                                                                                                                                                                                                                                                                                                                                                                                                  | 2-Methoxy-4-vinylphenol                                                                                                                                                                                                                                                                                           |

| Chemical group | VOCs in wheat kernel                                                                                                                                                                                                                                                                                                                                                                                                                                                                                                                                                                                                                              | VOCs in wheat beer |
|----------------|---------------------------------------------------------------------------------------------------------------------------------------------------------------------------------------------------------------------------------------------------------------------------------------------------------------------------------------------------------------------------------------------------------------------------------------------------------------------------------------------------------------------------------------------------------------------------------------------------------------------------------------------------|--------------------|
|                | Benzothiazole                                                                                                                                                                                                                                                                                                                                                                                                                                                                                                                                                                                                                                     |                    |
|                | 2,4-Di-tert-butylphenol                                                                                                                                                                                                                                                                                                                                                                                                                                                                                                                                                                                                                           |                    |
| Terpenes       | $\alpha$ -Phellandrene<br>$\alpha$ -Pinene<br>$\alpha$ -Thujene<br>$\beta$ -Pinene<br>$\alpha$ -Terpinene<br>p-Cymene<br>Limonene<br>$\gamma$ -Terpinene<br>cis-Linalool Oxide<br>Camphene<br>Levomenthol<br>$\alpha$ -Terpineol<br>Piperitone<br>Ascaridole<br>$\alpha$ -Cubebene<br>$\alpha$ -Copaene<br>$\beta$ -Bourbonene<br>$\beta$ -Caryophyllene<br>$\beta$ -Gurjunene<br>cis- $\beta$ -Farnesene<br>$\alpha$ -Humulene<br>D-Germacrene<br>$\beta$ -Selinene<br>Valencen<br>$\gamma$ -Cadinene<br>$\delta$ -Cadinene<br>trans-Calamenene<br>Dihydroactinidiolide<br>$\alpha$ -Calacorene<br>Spathulenol<br>$\beta$ -Selinenol<br>Cadalene | $\beta$ -Linalool  |
